# Supplementary material
Source: PubMed Central journal article supplement (PMC3341063)
Supplement: 1203479109_pnas.201203479SI.pdf [file 1203479109_pnas.201203479SI.pdf]

# Supporting Information

Yu et al. 10.1073/pnas.1203479109

## SI Materials and Methods

**Animals, Peptides, and Cell Lines.** Male 6- to 8-wk-old C57BL/6 mice were obtained from the National Cancer Institute (NCI) at Frederick, MD, and Ly5.1 C57BL/6 mice were purchased from Jackson Laboratory (Bar Harbor, ME). Animal use adhered to National Institutes of Health Laboratory Animal Care Guidelines and was approved by the NCI Animal Care and Use Committee (ACUC).

The peptides SNC9-H8 (STHVNHLHC) (1) and Ovalbumin (OVA)257-264 (SIINFEKL) were synthesized (GenScript). The TRAMP-C2 cell line derived from transgenic adenocarcinoma of mouse prostate (TRAMP) (2). The EL4 cell line derived from the C57BL/6N mouse lymphoma was used as a control for tumor cell specificity of the response. Both cell lines were purchased from American Type Culture Collection.

**Tumor Challenge and Treatment Experiments.** Groups of 10 mice each were injected s.c. in the flank on day 0 with  $5 \times 10^5$  TRAMP-C2 cells. On day 7, treatment was initiated only in animals with palpable s.c. tumors. Each mouse received 5  $\mu$ g of mIL-15 (PeproTech) i.p. daily, five times per week for 3 wk. Selected animals also received anti-mouse-PD-L1 (9G2; BioExpress), anti-CTLA-4 (UC10-4F10-11; BioExpress), or both. Isotype IgGs (rat IgG or hamster IgG) were administered along with mIL-15 as controls. One group of animals received anti-IL-10 (JES5-2A5; BioExpress) along with mIL-15. Another group was given a pan-neutralizing anti-mouse TGF- $\beta$ 1, 2, 3 mAb (1D11) that was a gift of the Genzyme Corporation with IL-15. The dose and dosing schedule used with these antibodies was 100  $\mu$ g per injection administered twice weekly for 3 wk. Control mice received PBS injections 100  $\mu$ L/d using the same dosing schedule as for mIL-15. In vivo depletion of CD25-expressing cells was accomplished using PC61 (BioExpress) 400  $\mu$ g per mouse, administered i.p. 4 d before inoculation of TRAMP-C2 tumor cells. Mice with large tumors were humanely killed using prospective ACUC-approved criteria to generate survival curves.

**In Vivo CD8<sup>+</sup> T Cell or NK Cell Depletion.** Groups of mice ( $n = 8$ ) were injected i.v. with  $5 \times 10^5$  TRAMP-C2 cells on day 0 and then received mIL-15 as described above. Groups of animals received 200  $\mu$ g of either rat anti-mouse-CD8 (clone 2.43; BioExpress) or 50  $\mu$ L per injection anti-asialo-GM1 (Wako) i.p. beginning on days 0 and 1, and then 3 times per week for 3 wk. Isotype control antibodies including rat IgG (clone LTF-2; BioExpress) or rabbit IgG were given at the same dosages to set up as controls. Tumor sizes were measured routinely.

**Cytokine Secretion and Cytotoxicity Assays.** Splenic CD8<sup>+</sup> T cells from treated animals were purified using magnetic beads (Miltenyi Biotec) and cocultured with SNC9-H8 peptides for 72 h in association with irradiated (3,000 rad) syngeneic splenocytes to function as APCs. To set up a control experiment, the same concentration of the OVA peptide was used as a control peptide. IFN- $\gamma$  was measured by ELISA (R&D Systems). Cytokine concentrations in supernatants were interpolated from the linear portion of ELISA standard curves.

To perform cytotoxicity assays and verify the specificity of the lysis activity, EL4 tumor cells were used as nonrelevant target cells for control of tumor specificity of the response. On day 21 after tumor challenge splenic cells were cultured with irradiated (100 Gy) TRAMP-C2 tumor cells or EL4 cells at a 50:1 ratio. Recombinant hIL-2 was added to yield a concentration of 10–15 U/mL. After 4 d

of culture, cytotoxicity assays were performed: effector (E) cells from each group were cultured with  $10^4$  TRAMP-C2 or EL4 target (T) cells per well in triplicate at various E/T ratios and incubated at 37 °C for 4 h. Cytotoxic activity was measured by LDH release using CytoTox 96 Non-Radioactive Cytotoxicity Assays (Promega). Percentage cytotoxicity was calculated as  $100 \times [(\text{experimental release}) - (\text{effector spontaneous release}) - (\text{target spontaneous release})] / [(\text{target maximum release}) - (\text{target spontaneous release})]$ .

**IFN $\gamma$  Secretion by Tumor-Infiltrating Lymphocytes (TILs).** TRAMP-C2 tumors were dissected from mice and cut into small pieces, then incubated with a solution containing 0.2 mg/mL DNase and 1.67 WunschU/mL Liberase (Roche) in unsupplemented RPMI 1640. Tumors were incubated at 37 °C for 30 min with shaking, disaggregated, passed through a 40- $\mu$ m filter, and washed several times. A Ficoll gradient was performed to eliminate dead cells and tumor debris. Alive TILs were seeded into 96-well plates and cocultured with SNC9-H8 peptides for 72 h in association with irradiated (3,000 rad) syngeneic splenocytes to function as APCs. IFN- $\gamma$  was measured by ELISA (R&D Systems). The cytokine concentration in supernatants was interpolated from the linear portion of the ELISA standard curves.

**CD4<sup>+</sup>CD25<sup>+</sup> T Cell Suppressor Assay.** Splenic CD4<sup>+</sup>CD25<sup>+</sup>/CD4<sup>+</sup>CD25<sup>−</sup> T cells from tumor-bearing animals were purified with CD4<sup>+</sup>CD25<sup>+</sup> isolation kits, and naïve splenic CD8<sup>+</sup> T cells were isolated with CD8 T cell isolation kits according to the manufacturer's protocols (Miltenyi Biotec). Purities of cells were greater than 95%. CD4<sup>+</sup>CD25<sup>−</sup> T cells ( $2 \times 10^5$ /well) or naïve CD8<sup>+</sup> T cells ( $2 \times 10^5$ /well) were cocultured with CD4<sup>+</sup>CD25<sup>+</sup> T cells from each treated group at different ratios as described with 1  $\mu$ g/mL of plate-bound anti-CD3 stimulation for 72 h, with <sup>3</sup>H-TdR (1  $\mu$ Ci/well) added to culture systems during the last 6 h to measure cell proliferation.

**Carboxyfluorescein Succinimidyl Ester (CFSE) Labeling CD8<sup>+</sup>CD122<sup>−</sup> T Cells and Cell Proliferation Tracking.** To evaluate inhibition of CD8<sup>+</sup>CD122<sup>−</sup> proliferation mediated by CD8<sup>+</sup>CD122<sup>+</sup> T cells, splenic CD8<sup>+</sup>CD122<sup>+</sup>/CD8<sup>+</sup>CD122<sup>−</sup> T cells were first purified with negative selection to deplete non-CD8 T cells (Miltenyi Biotec). CD8<sup>+</sup> T cells were incubated with biotin-labeled anti-CD122 antibody (eBioscience) and positively selected by Streptavidin-conjugated magnetic beads with magnetic columns (Miltenyi Biotec).

Naïve Ly5.1<sup>+</sup> CD8<sup>+</sup>CD122<sup>−</sup> T cells ( $3 \times 10^5$ /well) were labeled with CFSE (Invitrogen) and stimulated with plate-bound anti-CD3 (2.5  $\mu$ g/mL) along with soluble anti-CD28 (2.5  $\mu$ g/mL) for 48 h. Cells in selected wells were cocultured with CD8<sup>+</sup>CD122<sup>+</sup> T cells ( $1 \times 10^5$ /well) purified from tumor-bearing treated animals. Harvested cells were stained with anti-mouse Ly5.1, and cell differentiation was measured with flow cytometry.

**Statistical Analysis.** Kaplan-Meier nonparametric regression analysis was performed to assess survival times of tumor-bearing animals, with significance of differences determined by the log-rank test using JMP statistical software (SAS Institute). The ANOVA test was performed to compare tumor volumes using JMP statistical software. Comparisons of cytokine secretion among groups and absolute numbers of specific cell subsets were analyzed using an unpaired Student's *t* test. A value of  $P < 0.05$  was considered significant.

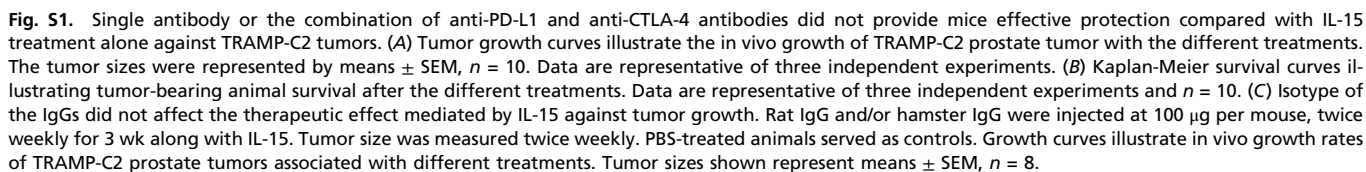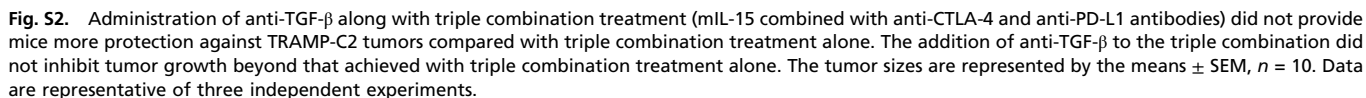

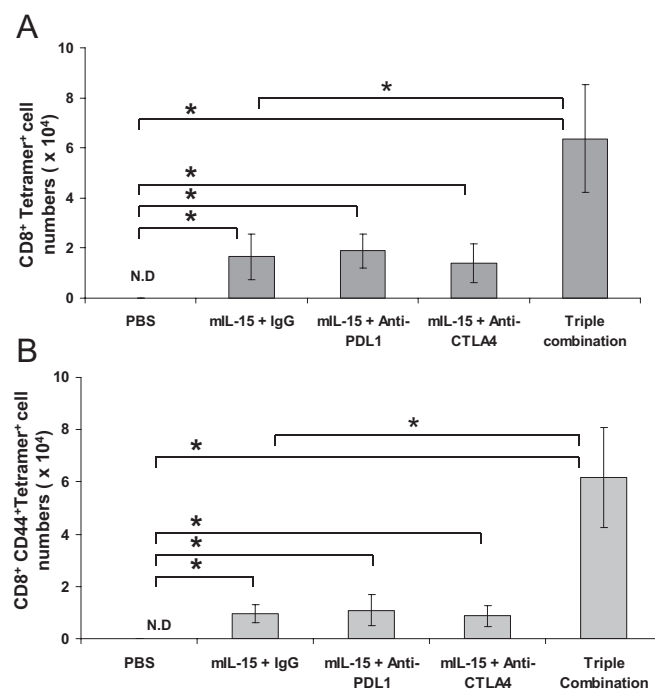

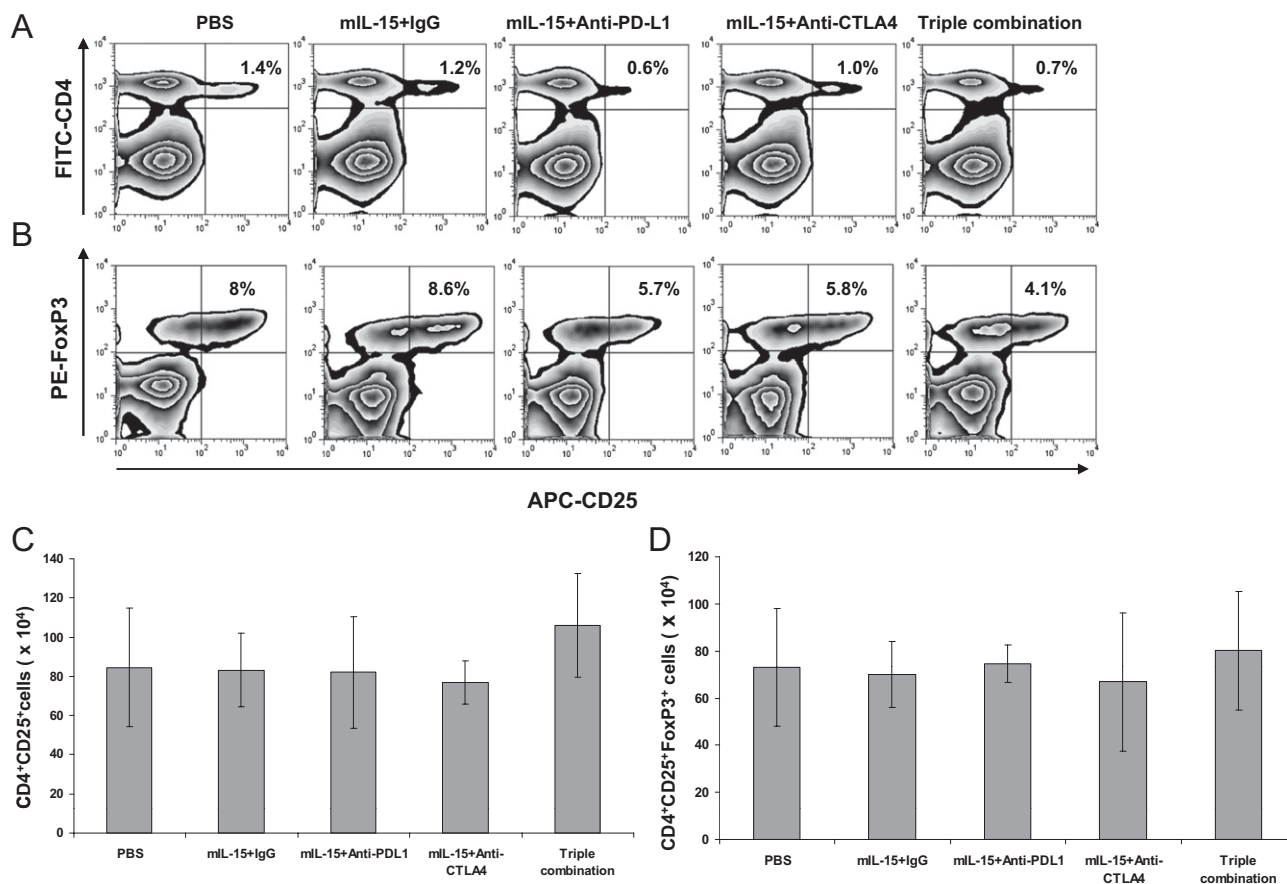

**Fig. S4.** IL-15 treatment with simultaneous blockade of CTLA-4 and PD1/PDL1 did not affect the numbers of CD4<sup>+</sup>CD25<sup>+</sup> regulatory T cells (Tregs). On day 21, splenocytes from tumor-bearing animals receiving different treatments were stained with Phycoerythrin (PE)-anti-FoxP3 intracellularly, along with APC-anti-CD25 and FITC-anti-CD4 antibodies. (A) Percentage of cells coexpressing CD4 and CD25, gated by forward and side scatter; (B) percentage of CD25<sup>+</sup>FoxP3<sup>+</sup> T cells, based on the gated CD4<sup>+</sup> T cells. (C) Absolute numbers of CD4<sup>+</sup>CD25<sup>+</sup> Tregs in each group. (D) Absolute numbers of CD4<sup>+</sup>CD25<sup>+</sup>FoxP3<sup>+</sup> Tregs in each group. Data represent three independent experiments, with each group containing 8–10 mice.

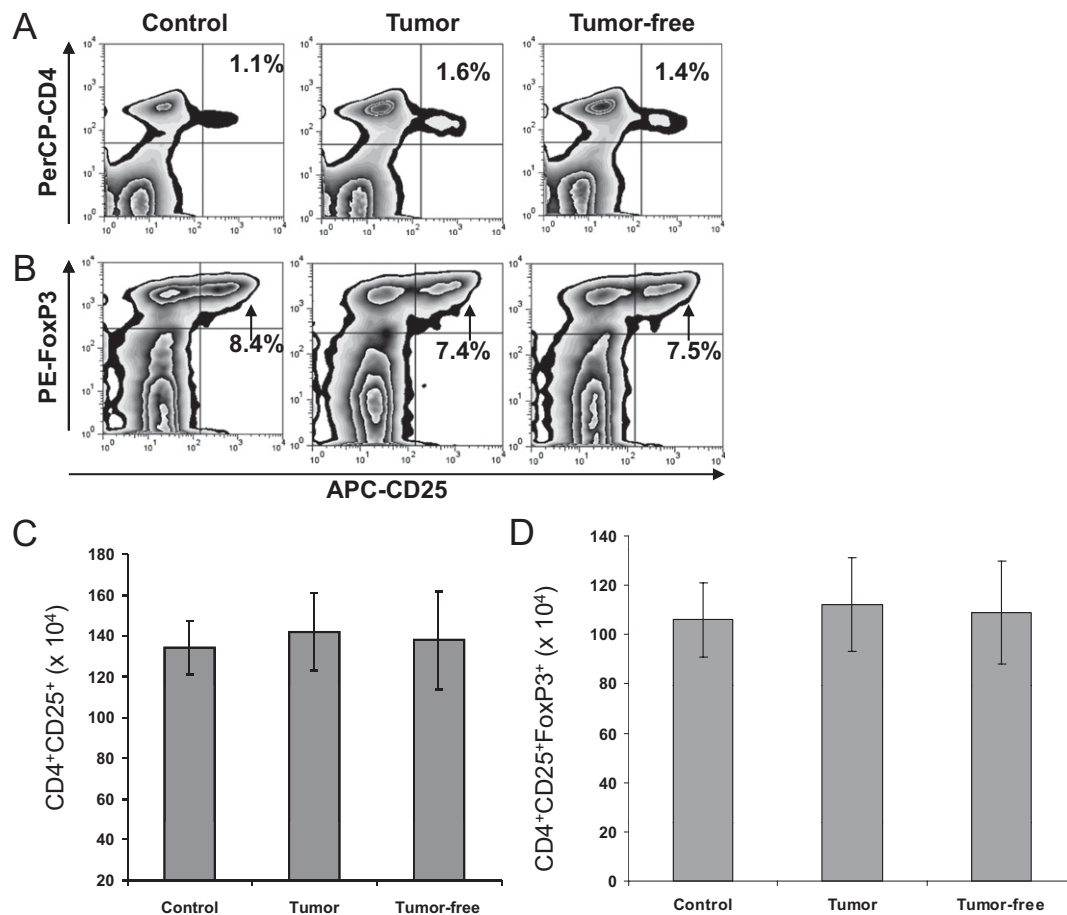

**Fig. S5.** TRAMP-C2 rechallenge against triple combination-treated animals did not affect the numbers of CD4<sup>+</sup>CD25<sup>+</sup> Treg cells. At the termination of the study, splenocytes from rechallenged animals were stained with PE-anti-FoxP3 intracellularly, along with APC-anti-CD25 and PerCP-anti-CD4 antibodies. (A) Percentage of cells coexpressing CD4 and CD25, gated by forward and side scatter; (B) percentage of CD25<sup>+</sup>FoxP3<sup>+</sup> T cells, based on the gated CD4<sup>+</sup> T cells. (C) Absolute numbers of CD4<sup>+</sup>CD25<sup>+</sup> Tregs in each group. (D) Absolute numbers of CD4<sup>+</sup>CD25<sup>+</sup>FoxP3<sup>+</sup> Tregs in each group. Data represent two independent experiments, with each group containing three mice.
